# Supplementary material for: Disparities for LGBTQ and Gender Nonconforming Adolescents
Source: Oxford University Press journal article supplement (doi:10.1542/peds.2017-3004), 2018-04-16
Supplement: peds_20173004supplementarydata.pdf [file peds_20173004supplementarydata.pdf]

## Supplemental Information

**SUPPLEMENTAL TABLE 6** Sexual and Gender Identity of Participants Across Different Response Categories of Gender Nonconformity

|                    | Response Categories Gender Nonconformity |       |       |       |       |
|--------------------|------------------------------------------|-------|-------|-------|-------|
|                    | 1                                        | 2     | 3     | 4     | 5     |
| Sexual identity, % |                                          |       |       |       |       |
| Heterosexual       | 53.60                                    | 30.96 | 12.84 | 1.86  | 0.74  |
| Gay or lesbian     | 9.51                                     | 22.32 | 33.83 | 23.22 | 11.11 |
| Bisexual           | 17.57                                    | 36.79 | 35.06 | 8.89  | 1.70  |
| Questioning        | 23.43                                    | 36.73 | 28.76 | 7.96  | 3.11  |
| Gender identity, % |                                          |       |       |       |       |
| Nontransgender     | 51.00                                    | 31.65 | 14.23 | 2.35  | 0.77  |
| Transgender        | 14.70                                    | 21.91 | 37.47 | 16.37 | 9.55  |

For biological males, responses were recoded so that low scores represent low gender nonconformity and high scores represent high gender nonconformity. Original item: "A person's appearance, style, dress, or the way they walk or talk may affect how people describe them. How do you think other people at school would describe you?" Original response categories: 1 = very or mostly feminine, 2 = somewhat feminine, 3 = equally feminine and masculine, 4 = somewhat masculine, 5 = very or mostly masculine.
